# Supplementary material for: P2Y6R-positive microglia sense the stress metabolite uridine and exacerbate photoreceptor degeneration in the retina
Source: Research Square preprint supplement (doi:10.21203/rs.3.rs-6578878/v1), 2025-05-12
Supplement: Supplementary file 1 [file c6eafc57220403a4f7cb8fa2.docx]

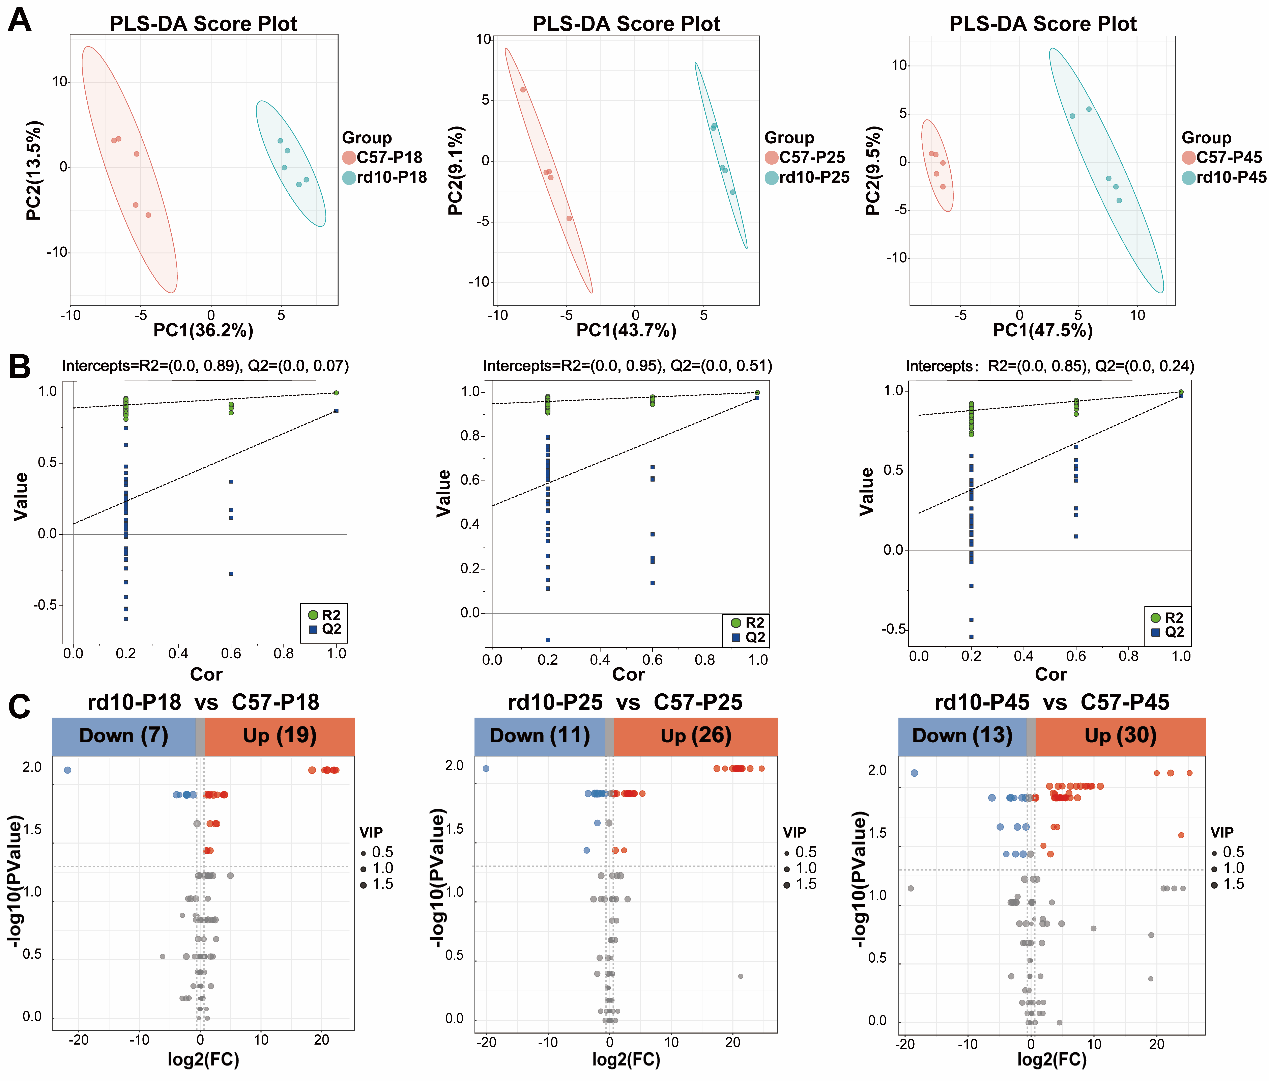


**Supplementary Fig. 1 Metabolomic analyses reveal distinct retinal metabolic profiles between rd10 and C57 mice at P18, P25, and P45.**

1. PLS-DA score plots for rd10 and C57 groups at P18 (left), P25 (center), and P45 (right).
2. Statistical validation of the PLS-DA model by permutation testing (n = 200) (P18 [left], R2Y = 0.094 and Q2 = 0.868; P25 [center], R2Y = 0.999 and Q2 = 0.974; P45 [right], R2Y = 0.996 and Q2 = 0.97).
3. Volcano plots of differential metabolites screened by VIP, P-value, and FC at P18 (left), P25 (center), and P45 (right). Each dot represents a metabolite, upregulated metabolites are shown in red, downregulated metabolites are shown in blue, and the metabolites with no significant difference are shown in gray. Significant changes are denoted by FC ≥ 1.5 or ≤ 0.67, P-value < 0.05, and VIP > 1. The size of the dot represents the VIP value.

PLS-DA: Partial Least Squares-Discriminant Analysis; FC: Fold change; VIP: Variable importance in projection.

**
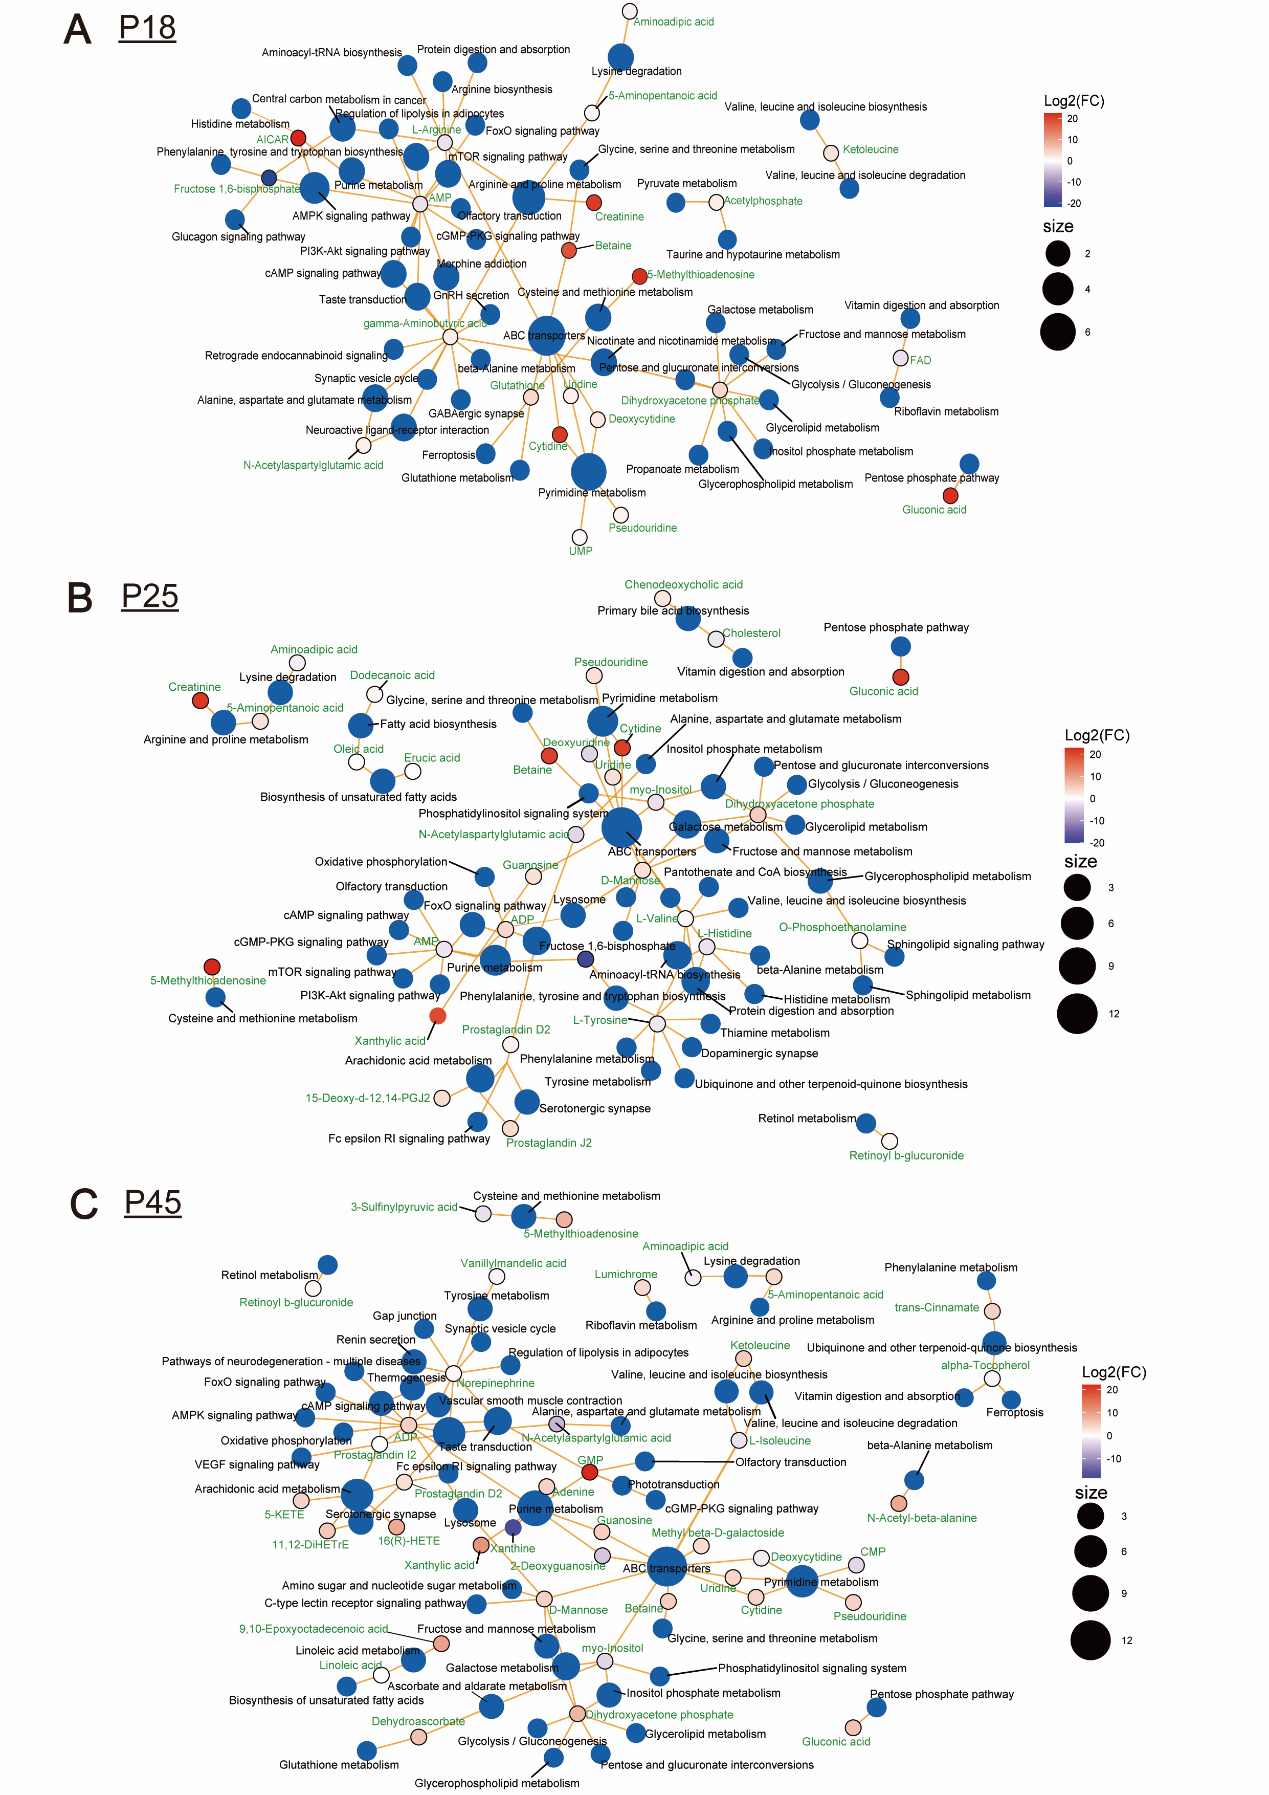
**

**Supplementary Fig. 2 The relationship between differential metabolites and metabolic pathways.**

**(A-B)** Network diagrams of metabolic pathways and metabolites at different time points.

FC: Fold change.


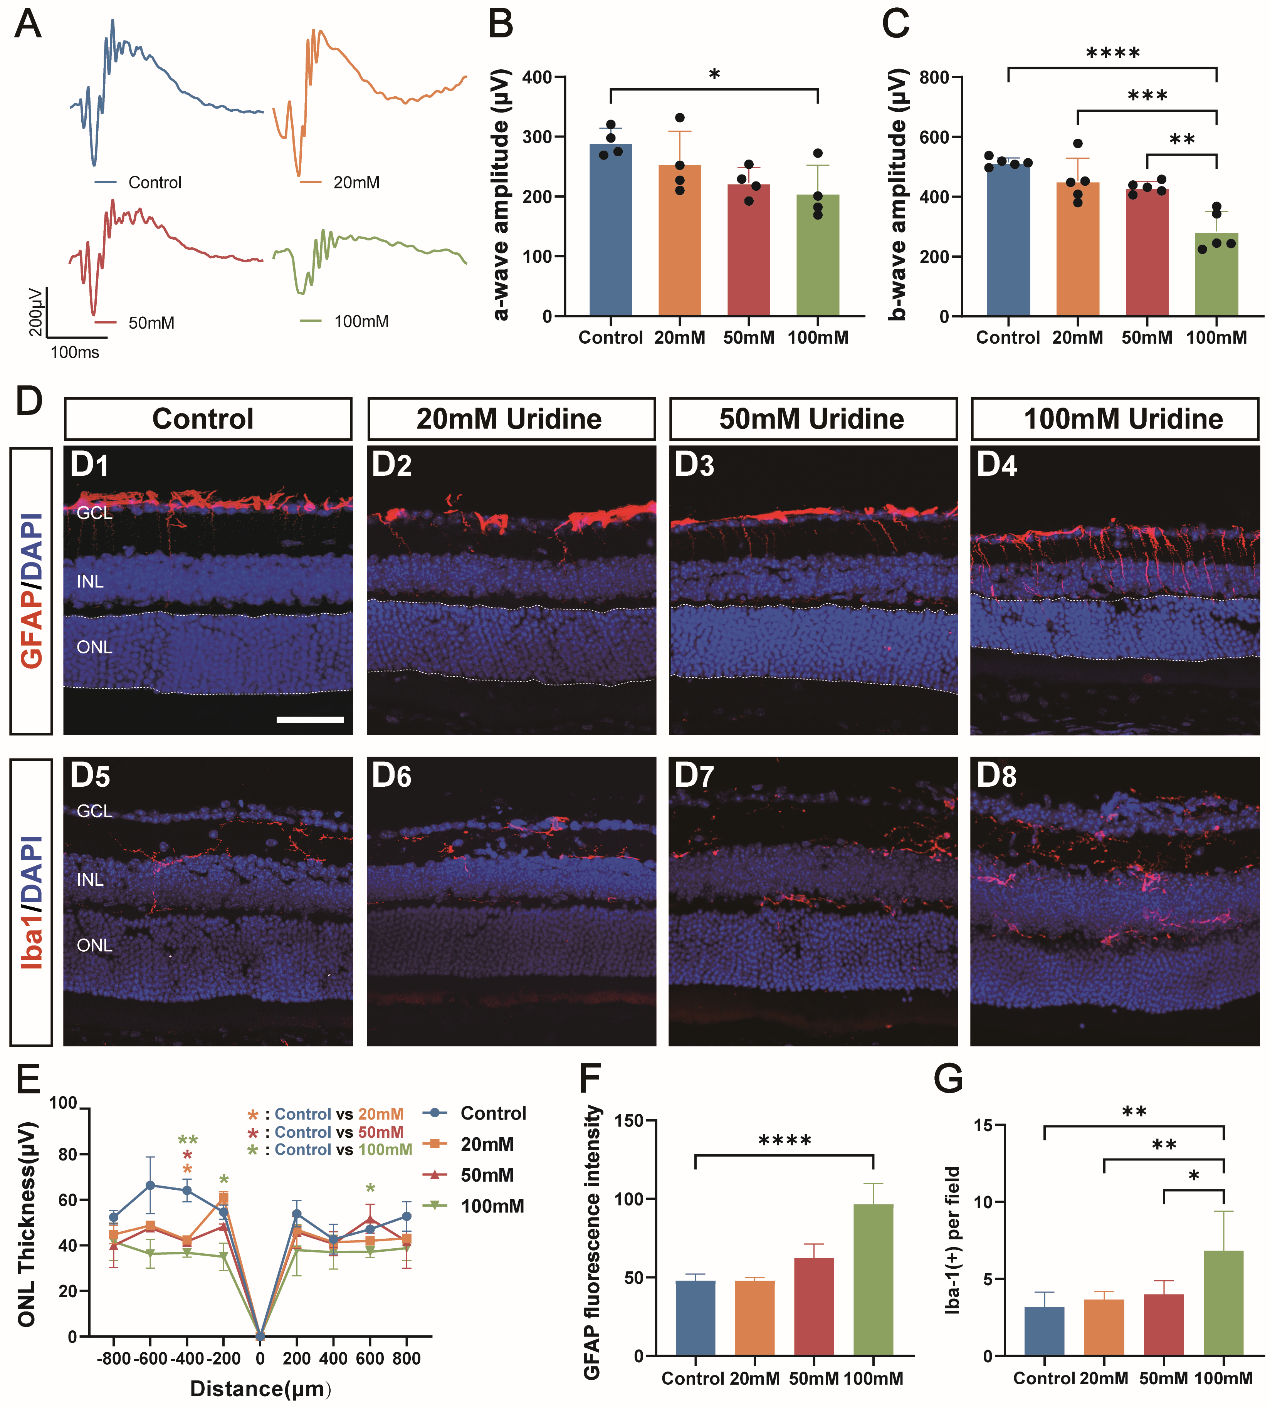


**Supplementary Fig. 3 A concentration gradient experiment of uridine is carried out.**

**(A)** Representative scotopic ERG waves (Flash Intensity = 3.0 cd·s/m2) of C57BL/6J mice were recorded 14 days after intravitreal injection of PBS or uridine.

**(B, C)** Quantification of the amplitude of a-waves and b-waves (Flash Intensity = 3.0 cd·s/m2) on day 14 after intravitreal injection (n = 4 and 5, respectively).

**(D)** Representative images of retinal sections from control and uridine-treated eyes immunostained for GFAP (D1-4, red) and Iba1(D5-8, red). Nuclei were visualized with DAPI (blue).

**(E)** Spidergrams of ONL thickness in control eyes and uridine-treated eyes were measured at 14 days after intravitreal injection (n = 3).

**(F)** Quantitative analysis of immunofluorescence intensity of GFAP (n = 3).

**(G)** Average Iba1-positive cell counts per image (n = 3).

GCL: ganglion cell layer; INL: inner nuclear layer; ONL: outer nuclear layer. Data represent mean ± SD. Statistics: Two-way ANOVA with Bonferroni’s multiple comparison test for E; One-way ANOVA for B, C, F, and G. **p* < 0.05, ***p* < 0.01, ****p* < 0.001, *****p* < 0.0001. Scale bars = 50 μm.


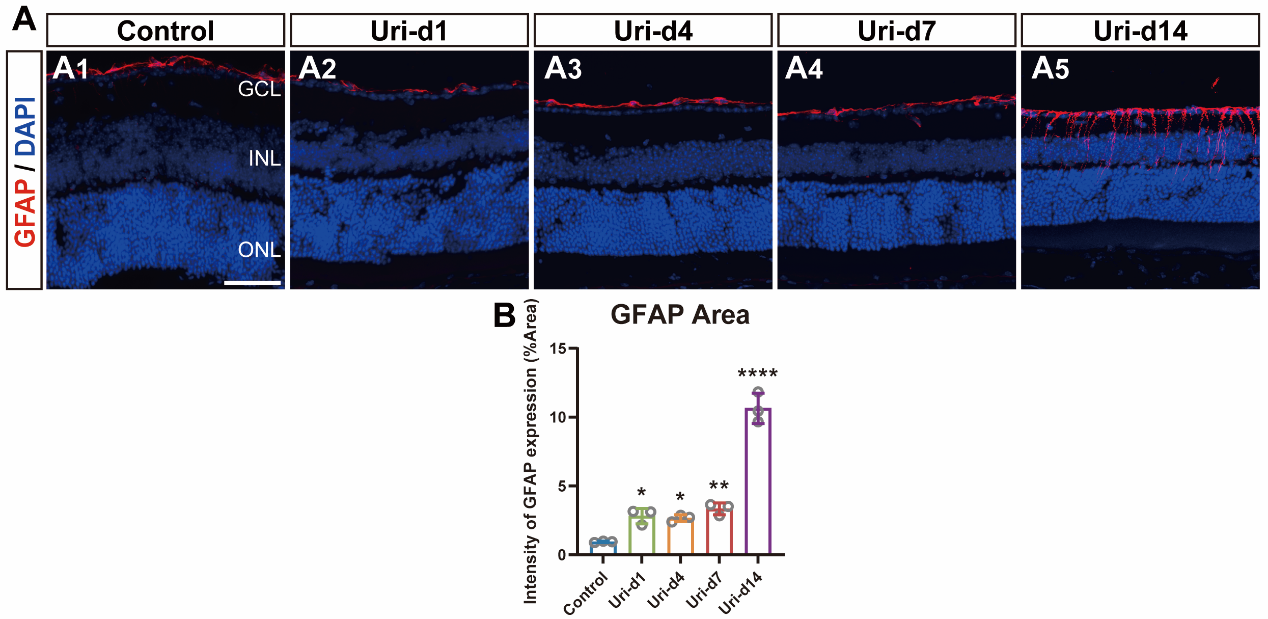


**Supplementary Fig. 4 Characterization of the time course of retinal gliosis reactivity following intravitreal injection of uridine in C57 mice.**

**(A)** Representative images of retinal sections from control and uridine-treated eyes immunostained for GFAP (A1-A5, red). Nuclei were visualized with DAPI (blue).

**(B)** Quantitative analysis of GFAP-positive area (n = 3).

GCL: ganglion cell layer; INL: inner nuclear layer; ONL: outer nuclear layer. Data represent mean ± SD. Statistics: One-way ANOVA for B. **p* < 0.05, ***p* < 0.01, *****p* < 0.0001 (*: versus control group). Scale bars = 50 μm.

**
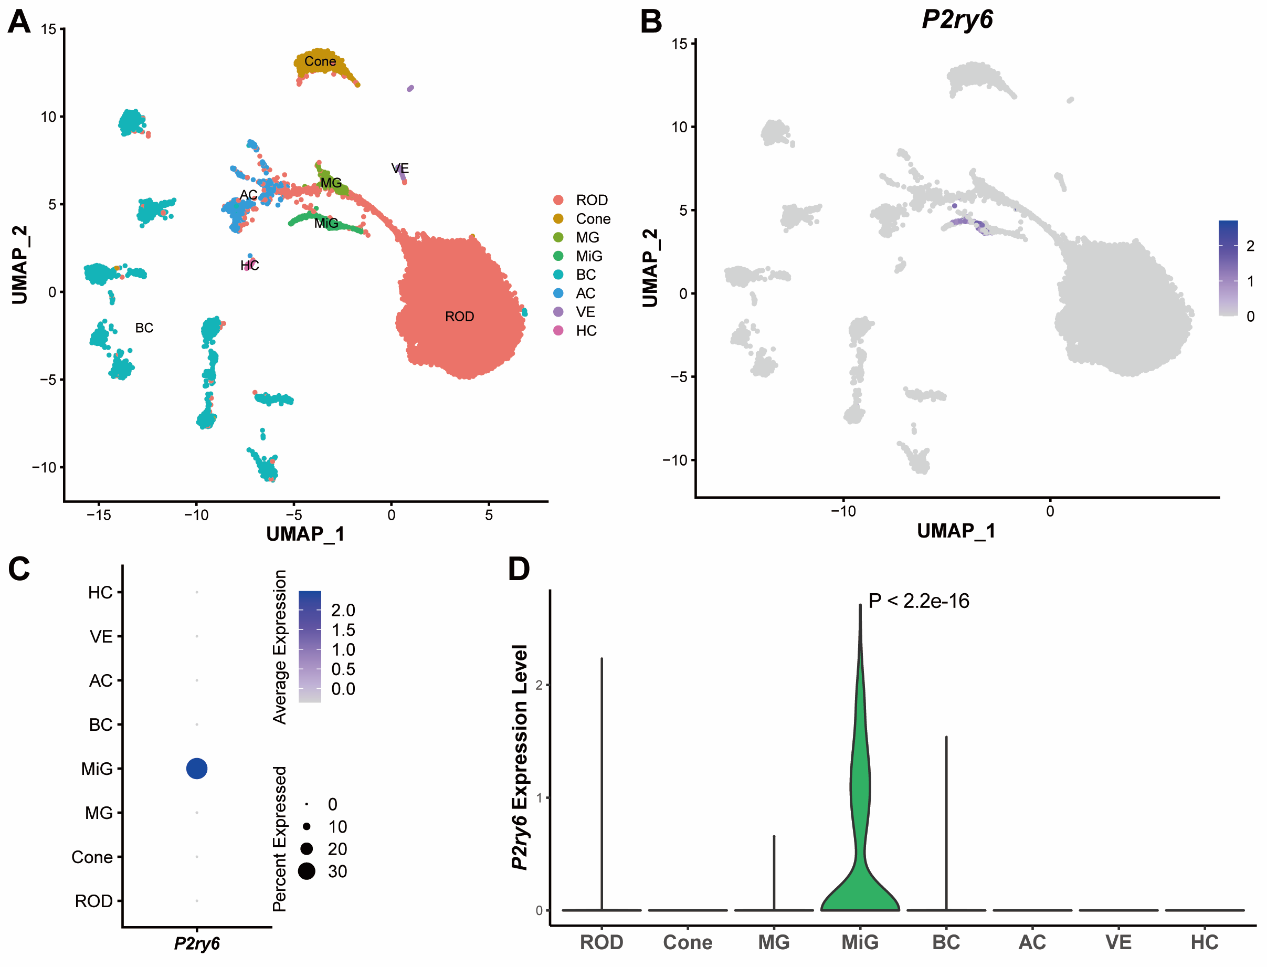
**

**Supplementary Fig. 5 *P2ry6* expression is observed primarily in microglial cells.**

**(A)** Uniform manifold approximation and projection (UMAP) of the single-cell RNA-seq datasets from mouse retinas in both C57 and rd10 groups, colored by annotated cell type.

**(B)** The expression levels of the *P2ry6* gene in the UMAP space.

**(C)** Bubble plot showing the *P2ry6* level in different cell types.

**(D)** Violin plot of *P2ry6* expression levels in each cell type.

ROD: rods; Cone: cones; MG: müller glial cells; MiG: microglia cells; BC: bipolar cells; AC: amacrine cells; VE: vascular endothelial cells; HC: horizontal cells. Statistics: Wilcox. Test for D (P: each cell type versus MiG).

**
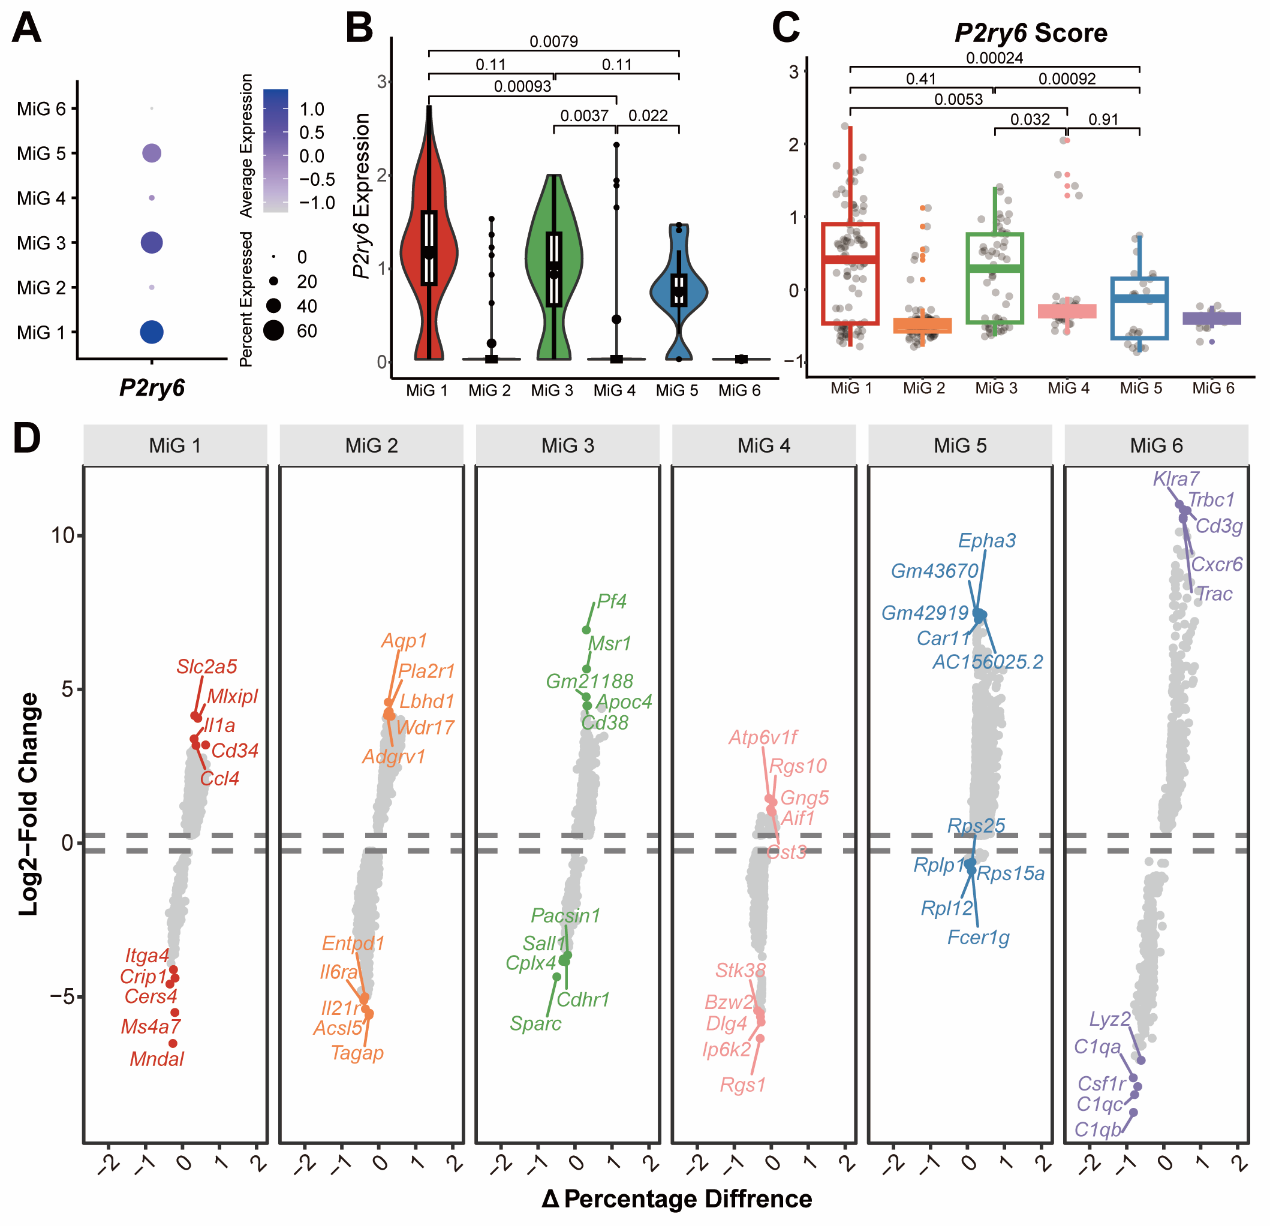
**

**Supplementary Fig. 6 Differential expression of *P2ry6* and subpopulation-specific marker genes across distinct microglial subpopulations.**

**(A)** Bubble plot showing the *P2ry6* level in different microglial subpopulations.

**(B)** Violin plot of *P2ry6* expression levels in each subpopulation.

**(C)** Box plot of *P2ry6* gene score in each subpopulation.

**(D)** Top-5 marker gene expression of microglial subpopulations.

Statistics: Wilcox. Test for B and C.

**
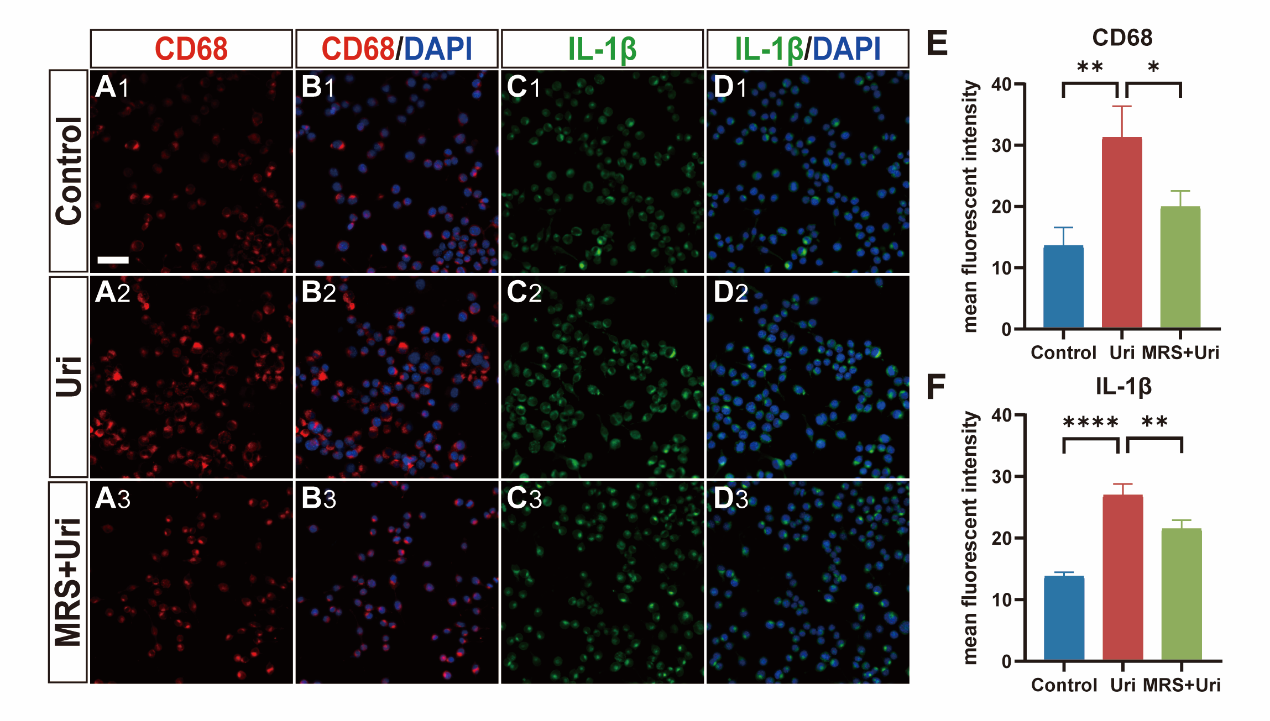
**

**Supplementary Fig. 7 Uridine induces high CD68 and IL-1β expression in BV2 microglia.**

**(A-D)** Immunofluorescence staining of CD68 (A1-3, B1-3) and IL-1β (C1-3, D1-3). DAPI-stained nuclei are shown in blue.

**(E, F)** Relative fluorescent intensity of CD68 (E) and IL-1β (F) among three groups (n = 3).

Data represent mean ± SD. Statistics: One-way ANOVA for E and F. **p* < 0.05, ***p* < 0.01, *****p* < 0.0001. Scale bars = 50 μm.
